## ANESTHESIOLOGY

# Analgesic Effects of Hydromorphone *versus* Buprenorphine in Buprenorphine-maintained Individuals

Andrew S. Huhn, Ph.D., Eric C. Strain, M.D.,  
George E. Bigelow, Ph.D., Michael T. Smith, Ph.D.,  
Robert R. Edwards, Ph.D., D. Andrew Tompkins, M.D., M.H.S.

ANESTHESIOLOGY 2019; 130:131–41

An increasing number of people are prescribed buprenorphine as a treatment for opioid use disorder.<sup>1,2</sup> Buprenorphine is effective at reducing the risk of overdose death and reducing craving for illicit opioids,<sup>3,4</sup> yet there are several clinical challenges in buprenorphine treatment, including the management of acute pain. Acute moderate to severe pain is quite common in persons on opioid replacement therapy,<sup>5,6</sup> and given that the prevalence of opioid use disorder in older Americans is projected to rise in the coming years (and these individuals are more likely to undergo surgeries),<sup>7</sup> there is a need to develop medication strategies for acute analgesia in buprenorphine-maintained individuals. The same factors that make buprenorphine an excellent treatment for opioid use disorder—for instance, it is a partial agonist with high affinity and slow dissociation from the  $\mu$ -opioid receptor<sup>8,9</sup>—can be barriers to effective acute pain management in perioperative and/or emergency situations.<sup>10</sup> In fact, experts in surgery,<sup>11</sup> anesthesia,<sup>12</sup> and emergency medicine<sup>13</sup> have called for more research in this area.

Researchers have examined pharmacologic characteristics of buprenorphine in persons with opioid use disorder. For example, higher dose buprenorphine can prevent opioid withdrawal and dampen hydromorphone effects for up to 72 h.<sup>14,15</sup> One study showed under double-blind conditions that hydromorphone subjective drug effects

## ABSTRACT

**Background:** Managing acute pain in buprenorphine-maintained individuals in emergency or perioperative settings is a significant challenge. This study compared analgesic and abuse liability effects of adjunct hydromorphone and buprenorphine using quantitative sensory testing, a model of acute clinical pain, in persons maintained on 12 to 16 mg sublingual buprenorphine/naloxone.

**Methods:** Participants (N = 13) were enrolled in a randomized within-subject, double-blind, placebo-controlled three-session experiment. Each session used a cumulative dosing design with four IV injections (4, 4, 8, and 16 mg of hydromorphone or 4, 4, 8, and 16 mg of buprenorphine); quantitative sensory testing and abuse liability assessments were measured at baseline and after each injection. The primary analgesia outcome was change from baseline cold pressor testing; secondary outcomes included thermal and pressure pain testing, as well as subjective drug effects and adverse events.

**Results:** A significant two-way interaction between study drug condition and dose was exhibited in cold pressor threshold ( $F_{10,110} = 2.14$ ,  $P = 0.027$ ) and tolerance ( $F_{10,110} = 2.69$ ,  $P = 0.006$ ). Compared to after placebo, participants displayed increased cold pressor threshold from baseline after cumulative doses of 32 mg of IV hydromorphone (means  $\pm$  SD) ( $10 \pm 14$  s,  $P = 0.035$ ) and 32 mg of buprenorphine ( $3 \pm 5$  s,  $P = 0.039$ ) and in cold pressor tolerance after cumulative doses of 16 mg ( $18 \pm 24$  s,  $P = 0.018$ ) and 32 mg ( $48 \pm 73$  s,  $P = 0.041$ ) IV hydromorphone; cold pressor tolerance scores were not significant for 16 mg ( $1 \pm 15$  s,  $P = 0.619$ ) or 32 mg ( $7 \pm 16$  s,  $P = 0.066$ ) buprenorphine. Hydromorphone and buprenorphine compared with placebo showed greater ratings on subjective measures of *high*, *any drug effects*, *good effects*, and *drug liking*. Adverse events were more frequent during the hydromorphone compared with buprenorphine and placebo conditions for nausea, pruritus, sedation, and vomiting.

**Conclusions:** In this acute clinical pain model, high doses of IV hydromorphone (16 to 32 mg) were most effective in achieving analgesia but also displayed higher abuse liability and more frequent adverse events. Cold pressor testing was the most consistent measure of opioid-related analgesia.

(ANESTHESIOLOGY 2019; 130:131–41)

## EDITOR'S PERSPECTIVE

### What We Already Know about This Topic

- The prevalence of patients prescribed buprenorphine for treatment of opioid use disorder is increasing
- Managing acute pain in buprenorphine-maintained individuals can be challenging

### What This Article Tells Us That Is New

- Large doses of intravenous hydromorphone can provide analgesia in buprenorphine-maintained individuals
- However, the use of hydromorphone for analgesia in buprenorphine-maintained individuals confers greater abuse liability and side effects than does supplemental intravenous buprenorphine

This article is featured in "This Month in Anesthesiology," page 1A. This article has a visual abstract available in the online version.

Submitted for publication March 8, 2018. Accepted for publication September 27, 2018. From The Johns Hopkins School of Medicine, Department of Psychiatry and Behavioral Sciences, Baltimore, Maryland (A.S.H., E.C.S., G.E.B., M.T.S.); Harvard Medical School, Brigham and Women's Hospital, Department of Anesthesiology, Perioperative, and Pain Medicine, Boston, Massachusetts (R.R.E.); and University of California, San Francisco Department of Psychiatry, San Francisco, California (D.A.T.).

Copyright © 2018, the American Society of Anesthesiologists, Inc. Wolters Kluwer Health, Inc. All Rights Reserved. Anesthesiology 2019; 130:131–41

(e.g., drug “liking” and “high”) were attenuated up to 98 h after buprenorphine dosing.<sup>16</sup> Additional parenteral buprenorphine (up to 16 mg) has been shown to produce euphoria in individuals maintained on 8 mg of daily buprenorphine, but this self-reported high was not as great as with hydromorphone (up to 18 mg).<sup>17</sup> Synthesizing these studies, maintenance buprenorphine does produce a long-lasting and dose-dependent blockade of hydromorphone euphorogenic effects, but this blockade is incomplete and can be overcome. It is unclear whether these results would translate to acute analgesia.

Quantitative sensory testing is a validated experimental model of acute pain and has been used in the development of novel analgesic agents.<sup>18</sup> Quantitative sensory testing includes standardized acute exposures to hot or cold temperatures, as well as pressure algometry applied to the skin, and correlates with acute opioid pain relief achieved during clinical treatment in the emergency room<sup>19</sup> and postoperatively.<sup>20</sup> However, quantitative sensory testing has rarely been used to examine analgesic response in patients with opioid use disorder.<sup>21,22</sup>

The present study used a double-blind, placebo-controlled human laboratory design to compare the analgesic effects of IV hydromorphone and IV buprenorphine on quantitative sensory testing in buprenorphine-maintained patients. Given the controversy surrounding whether to stop buprenorphine before surgery, we decided to standardize the time since maintenance dose and focus only on analgesic response to increasing doses of opioids. We hypothesized that hydromorphone, a full  $\mu$ -opioid agonist, would provide superior analgesia compared with buprenorphine given previous work on abuse liability and that both hydromorphone and buprenorphine would provide superior analgesia compared with placebo. Moreover, we postulated that hydromorphone would elicit greater abuse liability and that an association would emerge regarding abuse liability and analgesia for both IV hydromorphone and IV buprenorphine.

## Materials and Methods

### Study Design

This study used a double-blind, placebo-controlled within-subjects design and was conducted on a supervised residential research unit. Participants were maintained on 12 or 16 mg of sublingual buprenorphine/naloxone (doses within the recommended range for maintenance)<sup>23</sup> throughout the study. The order of the three experimental sessions (hydromorphone, buprenorphine, or placebo) was randomized by an unblinded study pharmacist, and sessions occurred at least 7 days apart to allow for a drug washout period, as well as to reduce likelihood of illicit drug relapse. Each residential session began 17 h after the

maintenance dose—baseline measures occurred at 9:00 AM, and the first IV drug administration occurred at 10:00 AM—to control for the effects of both circadian rhythms<sup>24</sup> and the time since maintenance dose. Participants had observed dosing of sublingual buprenorphine/naloxone by a study nurse the night before each session; each participant's treatment provider was contacted, and the Maryland Prescription Drug Monitoring Program was also reviewed to confirm ongoing maintenance dose. Participants were also monitored overnight after sessions to ensure resolution of opioid agonist effects. Buprenorphine/naloxone dose was held on session day to reduce risk of opioid toxicity.

### Participants

Medically stable participants ( $n = 13$ ) who were maintained on buprenorphine/naloxone (12 or 16 mg) for opioid use disorder completed three residential experimental sessions, each of which lasted 40 h. This study was registered on ClinicalTrials.gov (NCT01642030). Specimens, records, and data were obtained at The Johns Hopkins Bayview Medical Center, and The Johns Hopkins Institutional Review Board approved this study.

Inclusion criteria for the study were as follows: (1) age 18 to 60 yr; (2) opioid dependence according to the Mini International Neuropsychiatric Interview for the fourth edition of the *Diagnostic and Statistical Manual of Mental Disorders* (MINI)<sup>25</sup>; (3) urine toxicology negative for drugs of abuse but positive for opioid maintenance agent (only at session admission); (4) stable buprenorphine dose (12 to 16 mg) for the past 30 days; (5) absence of acute/chronic pain as determined by medical history and physical examination and score of 0 on the pain visual analog scale at the start of experimental sessions; and (6) able and willing to perform/tolerate pain procedures. Exclusion criteria for the study were as follows: (1) current alcohol dependence; (2) medical or psychiatric condition known to influence quantitative sensory testing (i.e., human immunodeficiency virus, peripheral neuropathy, schizophrenia, untreated current episode of major depressive disorder, and Raynaud's syndrome); (3) current use of prescribed or over-the-counter analgesic agents; (4) previous allergic reaction to hydromorphone or buprenorphine; and (5) women who were pregnant, lactating, or planning to become pregnant during the course of the study.

### Study Drugs

Hydromorphone was purchased from McKesson Corporation (USA) through the inpatient pharmacy at The Johns Hopkins Bayview Medical Center. Buprenorphine/naloxone sublingual filmstrips (maintenance dosing), as well as buprenorphine powder for IV drug preparation, was supplied by Indivior (USA). Both study drugs were

stored in locked cabinets at room temperature in The Johns Hopkins Behavioral Pharmacology Research Unit pharmacy. Hydromorphone, buprenorphine, or placebo was prepared on the morning of experimental sessions by the Behavioral Pharmacology Research Unit pharmacy staff, and study investigators were blind to the drug being given. The study physician administered the study drugs *via* slow IV push during more than a 5-min period.

## Experimental Sessions

Each of three blinded experimental sessions included quantitative sensory testing and abuse liability assessments completed at baseline and at four time points corresponding to expected peak dose effects of IV hydromorphone and buprenorphine, as well as at two additional time points after the last dose to measure waning analgesic response (total of seven time points). This study used a cumulative-dose design, commonly used in abuse liability studies<sup>26–28</sup> to mimic clinical practice in treatment of acute pain in the emergency department and postoperatively. Hydromorphone total dose was 32 mg IV (4-, 4-, 8-, and 16-mg individual doses given 90 min apart), and buprenorphine total dose was also 32 mg IV (4-, 4-, 8-, and 16-mg individual doses given 90 min apart).

Before each session, a nurse inserted an IV catheter in the non-pain-testing arm. At 9:00 AM, participants underwent baseline quantitative sensory testing and abuse liability testing (this battery lasted approximately 30 to 45 min). At 10:00 AM, 11:30 AM, 1:00 PM, and 2:30 PM, a physician administered hydromorphone, buprenorphine, or placebo *via* slow IV push over more than 5 min. Placebo administration was used to control for expectation bias and the known placebo analgesic effect of an IV drug administration related to release of endogenous opioids.<sup>29</sup> Quantitative sensory and abuse liability testing began 15 min after injection during each of the three sessions (when active drugs reach peak effect).<sup>30,31</sup> The battery of testing was also repeated at 4:00 PM and 5:30 PM.<sup>32</sup> There were 7 sessions (of a total of 39), which started a mean  $\pm$  SD of  $30.9 \pm 13.0$  min later because of weather, physician availability, or other unforeseen circumstance; however, the timing of each study medication dose was kept 90 min apart.

## Physiologic Measures

Physiologic measures included vital signs (pulse, blood pressure, and respiration rate) percentage of oxygen saturation, and pupil diameter. Vital signs and percentage of oxygen saturation were measured by trained medical staff at baseline and every minute during the 5 min of each study drug administration, as well as the 5 min after drug administration to ensure safety of the participant. Between injections and until the end of the study session, vital signs

and the percentage of oxygen saturation were measured every 15 min. Pupil diameter was assessed by research staff with a digital pupilometer (NeuroOptics, Inc., USA) in constant room lighting at baseline and at each time point. The measurements were not dark-adapted.

## Quantitative Sensory Testing

Trained research staff, after standardized protocol developed before study initiation, measured all quantitative sensory testing outcomes. Before performing quantitative sensory testing with study participants, research staff were required to show high agreement with the lead study investigator (D.A.T.).

**Cold Pressor Test.** The participant placed his or her hand up to the wrist in a circulating water bath (Versa Cool, Thermo Fisher Scientific, USA) maintained at approximately 4°C (up to 5 min). The amount of time in seconds between the first contact with cold water and the first instance of self-reported pain was defined as the *threshold*. The time during which a participant's hand remained underwater before pain was unbearable was defined as *tolerance*. The cold pressor test is specifically validated to evaluate the analgesic effects of opioids<sup>33</sup> and was the primary outcome in this study.

**Pressure Pain.** An electronic algometer (Somedic, Sweden) with a 1-cm<sup>2</sup> hard rubber probe was used to assess responses to noxious mechanical pressure on the trapezius and thumb.<sup>34,35</sup> Pressure was gradually increased at a constant rate (30 kPa/s). Pressure pain *threshold* was defined as the pressure (kPa) at which the participant reported pain, and the average threshold across two trials was calculated.

**Thermal Pain.** Contact heat stimuli (at non-tissue-damaging temperatures) were delivered using a Peltier element-based stimulator on the dorsal forearm of the arm without the IV (Pathway model CHEPS; Medoc, Israel). The thermode's temperature gradually increases 0.5°C/s from a preset baseline (31°C) until no longer tolerated (maximum 51°C). The thermal pain *threshold* was defined as the temperature (°C) at which the participant first reported pain, and thermal pain *tolerance* was defined as the temperature at which the pain became unbearable. Threshold and tolerance scores were averaged across two trials for each time point.

## Abuse Liability Assessments

**Visual Analog Scale.** Single-item questions that assessed subjective drug effects<sup>36</sup> were entered into a computer by the participant positioning an arrow along a 100-mm line marked at either end with "none" (0) and "extremely" (100). Questions included the following: (1) How high are you?; (2) Do you feel any drug effects?; (3) Does the drug

have any good effects?; (4) Does the drug have any bad effects?; (5) Do you like the drug?; and (6) Does this drug make you feel sick? The Food and Drug Administration recognizes the peak effects of “liking” as the primary outcome in abuse liability research.<sup>37</sup>

**Money versus Drug Questionnaire.** Participants were asked to indicate on a sliding scale a monetary value above which they would prefer money and below which they would prefer the drug they received during the experimental session.<sup>38,39</sup> This question was asked once at the end of the session and again on the following day.

**Next Day Questionnaire.** On the day after the experimental session, participants were asked to reflect on their overall session experience and answer a series of questions on the study drug effects, including the following: (1) Rate the overall strength of the drug effect you experienced yesterday; (2) How well did you like the drug you received yesterday?; (3) Did you feel any good effects from the drug yesterday?; (4) Did you feel any bad effects from the drug you received yesterday?; and (5) Rate the degree to which you would like to take again yesterday’s drug. Participants were also asked to estimate the amount of money the drug would be worth on the street.<sup>38,39</sup>

## Statistical Analysis

An *a priori* power analysis was based upon prior work examining euphorogenic effects of parenteral buprenorphine and hydromorphone *versus* placebo in buprenorphine-maintained individuals,<sup>17</sup> because no similar work has examined opioid analgesia in this population. Using the statistical analysis plan described in this section, the power analysis estimated 80% power to detect session effect sizes of 0.23 or greater with a sample size of 30. For each quantitative sensory testing, physiologic, and abuse liability outcome, a two-way repeated measures ANOVA with a Bonferroni adjustment for main effects was used to measure within-subject differences between experimental conditions (hydromorphone, buprenorphine, and placebo) across time points; given a significant interaction between experimental condition and time, a one-way repeated measures ANOVA with a Bonferroni *post hoc* adjustment was used by each time point. All quantitative sensory testing data were adjusted to change from baseline scores. Raw data for peak quantitative sensory testing analgesia, peak minimum session physiologic data, and peak abuse liability assessments were also analyzed *via* one-way repeated measures ANOVA with Bonferroni adjustment. Fisher exact tests were used to determine differences between sessions regarding adverse events. Missing data were excluded casewise and not interpolated;  $\alpha$  levels for significant findings were set at  $P < 0.05$ , and analyses were conducted using SPSS version 24.0 (IBM Corporation, USA).

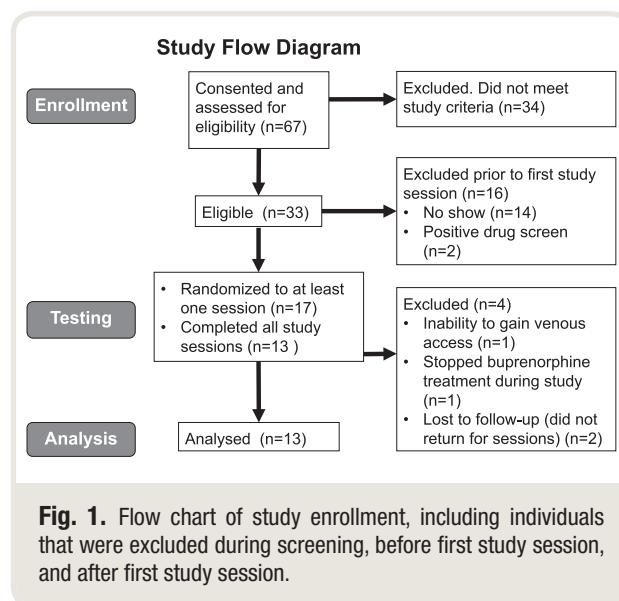

**Fig. 1.** Flow chart of study enrollment, including individuals that were excluded during screening, before first study session, and after first study session.

## Results

Participants were recruited between 2013 to 2017 from buprenorphine providers in the Baltimore, Maryland, area. In total, 67 persons presented for an in-person screening, and 33 (49%) qualified to be in the study (fig. 1). Of those who qualified, 17 were randomized and received at least one dose of study medication. Four participants did not complete all three sessions. Their information was included in the analysis of adverse events (safety) but not in the analysis of quantitative sensory testing and abuse liability outcomes. Of these four, one person was withdrawn because of inability to obtain venous access for the third session; one person was withdrawn because he stopped his buprenorphine program after the first session; and two others were lost to follow-up.

Participants who completed the study ( $N = 13$ ) had a mean  $\pm$  SD age of  $43 \pm 11$  yr, had a mean  $\pm$  SD body mass index of  $27 \pm 4$ , were primarily male (69%), and were African American (69%). Participants had been on buprenorphine maintenance for a mean  $\pm$  SD of  $8 \pm 11$  months. Last, the majority of study completers (77%) were current smokers.

## Analgesia Outcomes (Quantitative Sensory Testing)

The prespecified primary quantitative sensory testing outcome was cold pressor tolerance, because this has shown the greatest ability to predict opioid analgesia. Participants displayed a significant two-way interaction in cold pressor threshold ( $F_{10,110} = 2.14$ ,  $P = 0.027$ ) and tolerance ( $F_{10,110} = 2.69$ ,  $P = 0.006$ ), which was attributed to increased cold pressor threshold and tolerance during the hydromorphone compared with the placebo condition and increased cold pressor threshold in the buprenorphine compared with placebo condition (fig. 2).



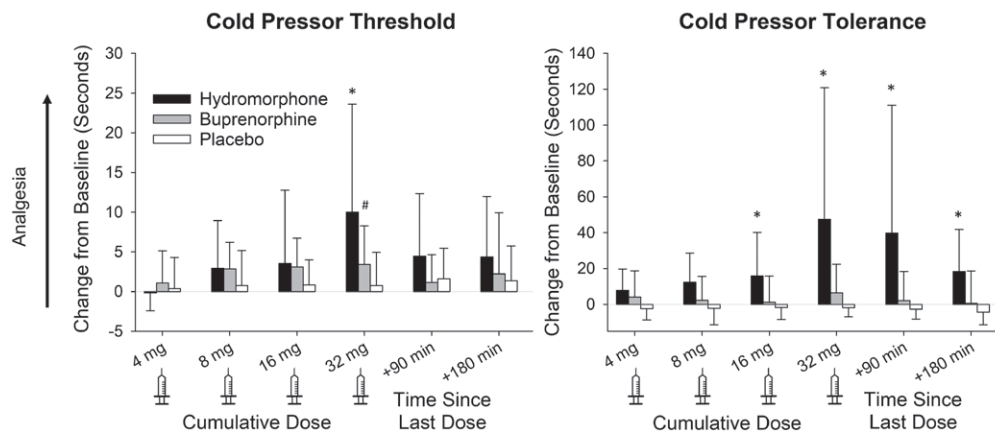

**Fig. 2.** Change from baseline and subsequent mean values for cold pressor testing, which was performed 15 min after each injection (4-, 4-, 8-, and 16-mg individual doses given 90 min apart, corresponding to cumulative doses of 4, 8, 16, and 32 mg, respectively), as well as 90 and 180 min after final drug administration. Repeated-measures ANOVA with Bonferroni correction was used to examine pairwise comparisons at each time point. Bars represent sample means, and error bars represent standard deviations. For hydromorphone *versus* placebo, \* $P < 0.05$ . For buprenorphine *versus* placebo, # $P < 0.05$ .

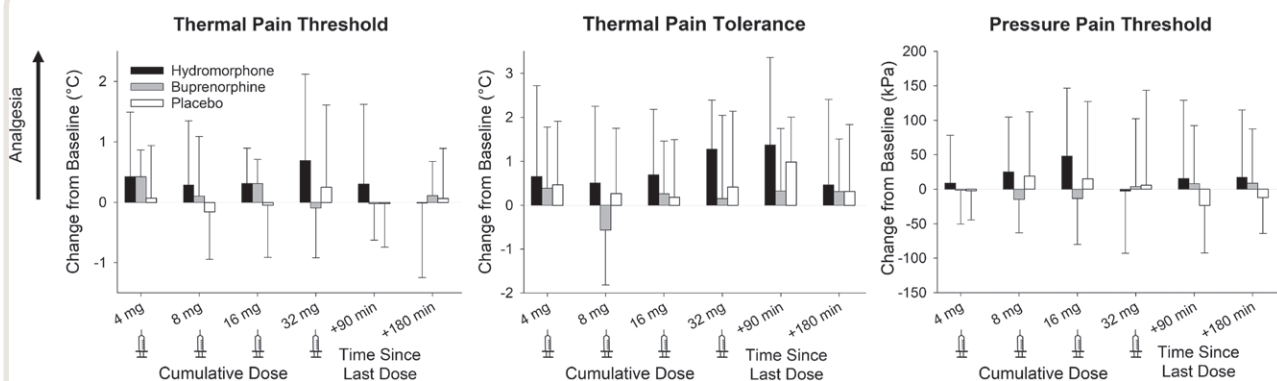

**Fig. 3.** Change from baseline and subsequent mean values for thermal pain and pressure pain was performed 15 min after each injection (4-, 4-, 8-, and 16-mg individual doses given 90 min apart, corresponding to cumulative doses of 4, 8, 16, and 32 mg, respectively), as well as 90 and 180 min after final drug administration. Repeated-measures ANOVA with Bonferroni correction was used to examine pairwise comparisons at each time point. Bars represent sample means, and error bars represent standard deviations. No significant differences were found in these pain testing modalities.

There were no significant differences regarding change from baseline scores in pressure pain threshold ( $F_{10,110} = 1.06$ ,  $P = 0.399$ ), thermal pain threshold ( $F_{10,110} = 0.90$ ,  $P = 0.534$ ), or thermal pain tolerance ( $F_{10,110} = 1.68$ ,  $P = 0.095$ ) (fig. 3). Within-session baseline and peak outcomes from each task are listed in table 1.

### Physiologic Outcomes

Participants displayed a significant two-way interaction in percentage of oxygen saturation ( $F_{10,110} = 3.44$ ,  $P = 0.001$ ), with reduced percentage of oxygen saturation after a 16-mg cumulative dose of buprenorphine and after 16- and 32-mg

cumulative doses of hydromorphone, relative to placebo (fig. 4). There were no significant two-way interactions in heart rate or blood pressure across time points. Differences in session minimum blood pressure can be found in table 1. Participants displayed a significant two-way interaction in change from baseline pupil diameter ( $F_{10,110} = 4.99$ ,  $P < 0.001$ ). As expected, participants displayed a larger decrease in pupil diameter (miosis) in the hydromorphone condition relative to buprenorphine or placebo and in the buprenorphine condition relative to placebo (fig. 4), although the mean pupil size was not pinpoint, demonstrating the ongoing blocking effect of maintenance buprenorphine.

**Table 1.** Baseline and Peak Values for Quantitative Sensory Testing and Physiologic Measures

| Values                                       | Placebo        | Buprenorphine                  | Hydromorphone                     | F (P value)          |
|----------------------------------------------|----------------|--------------------------------|-----------------------------------|----------------------|
| Quantitative sensory testing                 |                |                                |                                   |                      |
| Cold pressor threshold (mean $\pm$ SD), s    |                |                                |                                   |                      |
| Baseline                                     | 11 $\pm$ 4     | 13 $\pm$ 6                     | 12 $\pm$ 5                        |                      |
| Peak                                         | 12 $\pm$ 6     | <b>16 <math>\pm</math> 8*</b>  | <b>22 <math>\pm</math> 18*</b>    | <b>4.27 (0.027)</b>  |
| Cold pressor tolerance (mean $\pm$ SD), s    |                |                                |                                   |                      |
| Baseline                                     | 33 $\pm$ 16    | 35 $\pm$ 21                    | 30 $\pm$ 12                       |                      |
| Peak                                         | 32 $\pm$ 18    | <b>42 <math>\pm</math> 28*</b> | <b>79 <math>\pm</math> 82*</b>    | <b>4.53 (0.023)</b>  |
| Thermal pain threshold (mean $\pm$ SD), °C   |                |                                |                                   |                      |
| Baseline                                     | 42.6 $\pm$ 2.7 | 43.2 $\pm$ 3.0                 | 42.3 $\pm$ 3.3                    |                      |
| Peak                                         | 43.3 $\pm$ 3.1 | 43.4 $\pm$ 3.2                 | 43.4 $\pm$ 3.1                    | 0.01 (0.994)         |
| Thermal pain tolerance (mean $\pm$ SD), °C   |                |                                |                                   |                      |
| Baseline                                     | 46.9 $\pm$ 2.2 | 47.1 $\pm$ 2.2                 | 47.2 $\pm$ 2.2                    |                      |
| Peak                                         | 47.1 $\pm$ 2.2 | 47.0 $\pm$ 2.3                 | <b>47.9 <math>\pm</math> 2.1†</b> | <b>4.33 (0.026)</b>  |
| Pressure pain threshold (mean $\pm$ SD), kPa |                |                                |                                   |                      |
| Baseline                                     | 378 $\pm$ 110  | 365 $\pm$ 143                  | 400 $\pm$ 133                     |                      |
| Peak                                         | 390 $\pm$ 158  | 369 $\pm$ 158                  | 411 $\pm$ 116                     | 0.62 (0.550)         |
| Physiologic measures (minimum mean $\pm$ SD) |                |                                |                                   |                      |
| Heart rate, beats per minute                 | 54 $\pm$ 9     | 55 $\pm$ 12                    | 55 $\pm$ 9                        | 0.35 (0.707)         |
| Systolic, mmHg                               | 97 $\pm$ 10    | <b>90 <math>\pm</math> 8*</b>  | 99 $\pm$ 8                        | <b>7.83 (0.004)</b>  |
| Diastolic, mmHg                              | 59 $\pm$ 5     | <b>52 <math>\pm</math> 6*</b>  | <b>58 <math>\pm</math> 7†</b>     | <b>10.87 (0.001)</b> |

Baseline and peak values for quantitative sensory testing. Baseline values were collected approximately 60 min before drug administration, and peak values were taken after placebo or a cumulative dose of 32 mg of buprenorphine or hydromorphone. Minimum values for physiologic measures represent the lowest measurement during the entire session. Repeated measures ANOVA values with Bonferroni correction are shown for comparison between placebo, buprenorphine, and hydromorphone. Significant differences are in bold type.

\*Difference from placebo,  $P < 0.05$ . †Difference from buprenorphine,  $P < 0.05$ .

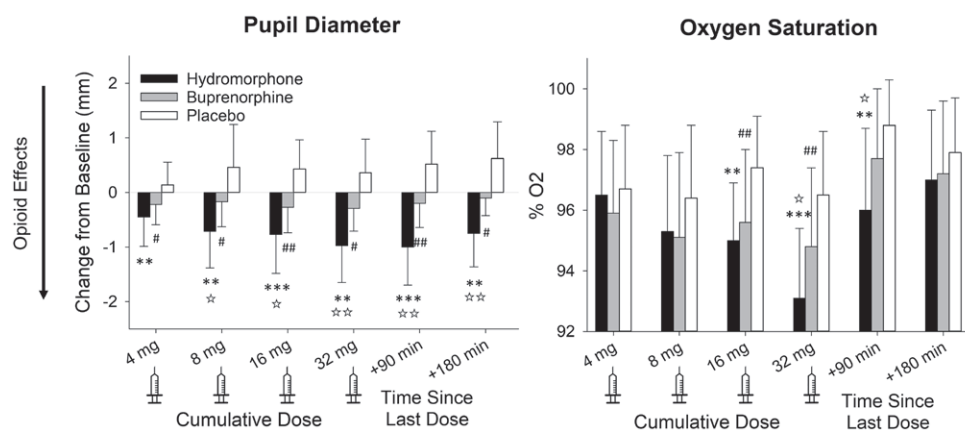

**Fig. 4.** Change from baseline pupil diameter and minimum values for percentage of oxygen saturation for the 10 min surrounding each injection (4-, 4-, 8-, and 16-mg individual doses given 90 min apart, corresponding to cumulative doses of 4, 8, 16, and 32 mg, respectively), as well as 90 and 180 min after final drug administration. Repeated-measures ANOVA with Bonferroni correction was used to examine pairwise comparisons at each time point. Bars represent sample means, and error bars represent standard deviations. For hydromorphone versus placebo, \*\* $P < 0.01$  or \*\*\* $P < 0.001$ . For buprenorphine versus placebo, # $P < 0.05$  or ## $P < 0.01$ . For hydromorphone versus buprenorphine, ☆ $P < 0.05$  or ☆☆ $P < 0.01$ . Millimeter (mm); percentage of oxygen saturation (%  $O_2$ ).

## Abuse Liability Outcomes

There were no significant two-way interactions among the abuse liability assessments across time points. There were significant differences in peak effects (after 32 mg of either hydromorphone or buprenorphine) for *high*, *drug effects*, *good*

*effects*, and *liking* but not for *bad effects* or *sick* (see table 2 for details). One day after sessions, participants endorsed different levels of *desire to take drug again* in the hydromorphone (mean  $\pm$  SD) 61  $\pm$  34, buprenorphine 46  $\pm$  37, and placebo 21  $\pm$  35 sessions ( $F_{2,11} = 5.85$ ,  $P = 0.021$ ); pairwise

**Table 2.** Peak Values of Abuse Liability Measures

| Peak Values  | Placebo | Buprenorphine   | Hydromorphone    | F (P value)               |
|--------------|---------|-----------------|------------------|---------------------------|
| High         | 15 ± 26 | <b>49 ± 30*</b> | <b>65 ± 28†‡</b> | <b>18.03 (&lt; 0.001)</b> |
| Drug effects | 15 ± 22 | <b>53 ± 32*</b> | <b>75 ± 25†‡</b> | <b>20.73 (&lt; 0.001)</b> |
| Good effects | 15 ± 22 | <b>53 ± 35*</b> | <b>55 ± 34*</b>  | <b>13.76 (&lt; 0.001)</b> |
| Liking       | 16 ± 22 | <b>50 ± 31*</b> | <b>53 ± 37*</b>  | <b>13.78 (&lt; 0.001)</b> |
| Bad effects  | 6 ± 15  | 19 ± 18         | 24 ± 30          | 2.26 (0.128)              |
| Sick         | 5 ± 15  | 11 ± 18         | 20 ± 35          | 1.34 (0.283)              |

Values shown are mean ± SD (VAS 0–100). Session peak values for abuse liability testing were taken after placebo or a cumulative dose of 32 mg of buprenorphine or 32 mg of hydromorphone. Repeated measures ANOVA values with Bonferroni correction are shown for comparison between buprenorphine, hydromorphone, and placebo. Significant differences are in bold type.

\*Difference from placebo,  $P < 0.05$ . †Difference from placebo,  $P < 0.001$ . ‡Difference from buprenorphine,  $P < 0.05$ .

VAS, visual analog scale.

**Table 3.** Frequency of Adverse Events

| Event                 | Placebo  | Buprenorphine | Hydromorphone    |
|-----------------------|----------|---------------|------------------|
| Nausea                | 0        | 0             | <b>8 (61.5)*</b> |
| Pruritus              | 0        | 1 (7.7)       | <b>6 (46.2)†</b> |
| Sedation              | 0        | 3 (23.1)      | <b>6 (46.2)‡</b> |
| Vomiting              | 0        | 0             | <b>5 (38.5)†</b> |
| Somnolence            | 2 (15.4) | 7 (53.8)      | 7 (53.8)         |
| Headache              | 1 (7.7)  | 3 (23.1)      | 6 (46.2)         |
| Dry mouth             | 1 (7.7)  | 4 (30.8)      | 2 (15.4)         |
| Urinary retention     | 0        | 1 (7.7)       | 2 (15.4)         |
| Vision blurred        | 0        | 0             | 2 (15.4)         |
| Dyspepsia             | 1 (7.7)  | 0             | 1 (7.7)          |
| Abdominal pain, upper | 0        | 1 (7.7)       | 1 (7.7)          |
| Constipation          | 0        | 0             | 1 (7.7)          |
| Fatigue               | 2 (15.4) | 1 (7.7)       | 1 (7.7)          |
| Dizziness             | 0        | 0             | 1 (7.7)          |
| Infusion site pain    | 0        | 2 (15.4)      | 0                |
| Swelling              | 0        | 1 (7.7)       | 0                |
| Confusional state     | 0        | 2 (15.4)      | 0                |

Columns indicate the frequency counts and percentages of participants reporting an adverse event in each study condition. Adverse events were coded according to terms in the Medical Dictionary for Regulatory Activities. Fisher exact test used to identify differences between conditions. Significantly different findings are in bold type.

\* $P < 0.001$ . † $P < 0.01$ . ‡ $P < 0.05$ .

comparisons revealed that desire to take drug again was greater in hydromorphone ( $P = 0.011$ ) and buprenorphine ( $P = 0.010$ ) conditions compared with placebo. Participants also endorsed different levels of *street value* (\$) in the hydromorphone  $30.4 \pm 24.6$ , buprenorphine  $25.2 \pm 26.5$ , and placebo  $5.8 \pm 7.0$  sessions ( $F_{2,11} = 5.30$ ,  $P = 0.031$ ); pairwise comparisons revealed that *street value* was greater in hydromorphone ( $P = 0.009$ ) and buprenorphine ( $P = 0.03$ ) conditions compared with placebo. Last, participants endorsed different levels of *willingness to pay* for the drug in the hydromorphone  $15.4 \pm 14.6$ , buprenorphine  $16.7 \pm 17.3$ , and placebo  $5.0 \pm 6.5$  sessions ( $F_{2,11} = 7.19$ ,  $P = 0.012$ ); pairwise comparisons revealed that willingness

to pay was greater in hydromorphone ( $P = 0.005$ ) and buprenorphine ( $P = 0.037$ ) conditions compared with placebo.

## Adverse Events

Despite the high doses of opioids given in this study, there were no serious adverse events, and the adverse events that were reported are common among individuals taking opioids for pain (e.g., nausea, somnolence, and dry mouth). Although rescue medication (naloxone) was available, it was never used. There were adverse events reported within each condition. Adverse events were coded using the Medical Dictionary for Regulatory Activities.<sup>40</sup> In the hydromorphone condition, the most common adverse events were nausea (61.5%) and somnolence (53.8%; table 3). In the buprenorphine condition, the most common adverse events were somnolence (53.8%) and dry mouth (30.8%). In the placebo condition, the most common adverse events were fatigue (15.4%) and somnolence (15.5%). A full list of adverse events can be found in table 3. Although these results suggest that patients on buprenorphine may tolerate larger opioid doses safely during the treatment of acute pain, the participant population was relatively healthy, with few co-occurring diseases and few, if any, concomitant medications.

## Discussion

### Major Findings: Analgesia versus Abuse Liability

This study reports on the analgesic properties of cumulative doses of IV hydromorphone and buprenorphine for individuals maintained on buprenorphine/naloxone. The results suggest that at least 16 mg of hydromorphone are necessary to provide analgesia during experimental pain testing; doses at or above the cumulative dose of 16 mg were sufficient to increase cold pressor threshold

and tolerance compared with placebo (fig. 2). In clinical situations, high doses of supplemental opioids for this population may be required for pain relief. Our results also suggest that additional IV buprenorphine may be useful in clinical pain management. However, the peak effects of hydromorphone also resulted in increases on abuse liability indices, most notably increased *drug effects*, *high, good effects*, and *liking* (table 2). Moreover, participants in the hydromorphone and buprenorphine conditions endorsed other indices of abuse liability after the session, including greater desire to take the drug again, street value of the drug, and willingness to pay for the drug. The balance between analgesia and abuse liability is particularly important in this population with opioid use disorder, and patients should be informed before use if possible that the opioid medication could trigger relapse.<sup>41</sup> In this study, additional IV buprenorphine showed significant analgesic effects on cold pressor threshold (although not as robust as hydromorphone), suggesting that buprenorphine could be used as an option where the risks of full  $\mu$ -opioid agonists outweigh the potential analgesic benefits. On the other hand, although not statistically significant, a cumulative dose of 32 mg of hydromorphone provided marginally increased cold pressor threshold and tolerance compared with 32 mg of buprenorphine, which may be clinically significant (fig. 2).

The similarity in analgesic results between hydromorphone and buprenorphine was quite surprising, because each dose of buprenorphine was predicted to result in up to four times greater analgesia than hydromorphone given standard opioid conversion tables.<sup>42</sup> These conversion tables are often developed from studies in opioid naïve individuals and may not account for receptor efficacy in full *versus* partial agonist opioids. This study provides further evidence that these conversion tables should be used with caution in buprenorphine-maintained individuals. In addition, analgesia and subjective effects lasted for much longer than predicted, with most patients reporting some degree of ongoing subjective drug effect 3 h after last study medication administration. In addition, significant analgesia was still present 3 h after last hydromorphone injection as indicated by increase in baseline cold pressor tolerance (fig. 2). Although buprenorphine has a greater interindividual variability in elimination half-life, no lingering analgesia was seen in any modality 3 h after last buprenorphine injection.

### Clinical *versus* Experimental Considerations

There were no serious adverse events, and the reported adverse events are common among individuals taking opioids for pain (e.g., nausea, somnolence, dry mouth).<sup>43</sup> It is noteworthy that participants tended to experience

more adverse events in the hydromorphone condition (table 3). In addition, there were significant decreases in minimum systolic and diastolic blood pressure in the buprenorphine *versus* placebo condition and decreased diastolic blood pressure in the buprenorphine *versus* hydromorphone condition. Previous studies have shown that opioid tolerance leads to dampened neurohormonal signaling that can result in insensitivity to high doses of full  $\mu$ -opioid agonists.<sup>44,45</sup> Furthermore, 16 and 32 mg of hydromorphone or buprenorphine did result in significant decreases in oxygen saturation compared with placebo (fig. 4), a vital sign that should be closely monitored when administering high doses of opioid agonists. Although unknown, it is likely that as the length of time since buprenorphine dose increases beyond 17 h, the analgesic benefits as well as the risks of IV hydromorphone would increase. Future studies could examine the time since buprenorphine dose and the response to IV opioids using similar rigorous methods, to assess whether clinical recommendations to stop buprenorphine before elective surgery might result in greater analgesic control with less opioid medication.

From an experimental standpoint, the finding that cold pressor testing was the most sensitive measure in discerning the analgesic effects of hydromorphone and buprenorphine is important for future studies in persons maintained on buprenorphine (fig. 2; table 1). Cold pressor testing has been used across studies to model opioid analgesia,<sup>33</sup> because it has shown sensitivity to a wide variety of opioids and is reliable over multiple testing sessions.<sup>46,47</sup> In addition, cold pressor testing has been used previously in buprenorphine maintenance to examine hyperalgesia.<sup>48</sup> In the present study, other measures of pain testing were not significant regarding change from baseline scores (fig. 3), although raw peak scores from thermal pain tolerance were significantly higher in the hydromorphone compared with buprenorphine condition (table 1). Cold pressor testing has been widely used to model acute musculoskeletal pain.<sup>49,50</sup> Musculoskeletal pain is commonly reported in accidental injury and can often lead to chronic pain conditions.<sup>51</sup> The cold pressor test has been shown to be more sensitive in discerning analgesic effects than heat or electrical stimulation in a study comparing two doses of transdermal fentanyl (a full  $\mu$ -opioid receptor agonist) and transdermal buprenorphine compared with placebo.<sup>41</sup> Cold pressor testing has also been reliable in measuring pain in healthy persons, as well as those with chronic pain<sup>52</sup>; this study extends the utility of the cold pressor task to individuals maintained on buprenorphine.

Although there is no consensus within the medical field regarding treatment of acute pain for individuals maintained on buprenorphine, recent guidelines have been suggested in the perioperative period.<sup>10</sup> These guidelines



address two main issues: whether to stop buprenorphine before surgery and how to optimize additional opioids to improve pain control while limiting risk for respiratory depression. This study did not address the first issue but does provide controlled evidence that doses up to 32 mg of IV hydromorphone or IV buprenorphine may be given safely without respiratory depression in select buprenorphine-maintained individuals. This finding is specific to persons maintained on 12 to 16 mg sublingual buprenorphine/naloxone for opioid use disorder, who are approximately 17 h removed from their last dose and in the absence of concomitant medications that may cause further respiratory depression or other negative effects. Determining the dose effects of adjunct opioids on acute pain is an important step in devising treatment strategies for buprenorphine-maintained individuals. Future randomized controlled trials should examine the analgesia requirements, surgical outcomes, and relapse risk associated with either stopping/reducing buprenorphine before elective surgery or continuing maintenance dose.

## Limitations

This study has several limitations. The low number of participants and the absence of chronic pain patients in this study limits the generalizability of the results. Previous controlled studies in buprenorphine-maintained patients have also used small sample sizes and found positive results,<sup>17</sup> and the present study found positive results *via* the cold pressor task despite recruiting a smaller sample size than suggested by our *a priori* power analysis. In addition, morphine-equivalent doses of hydromorphone and buprenorphine were not used; instead, normally prescribed doses were used, which have more direct clinical implications (comparative effectiveness) but limit the ability to determine comparative efficacy. It is challenging to provide morphine-equivalent doses when comparing a full  $\mu$ -opioid agonist *versus* partial agonist. Commonly used instruments indicate that the relative analgesic ratio for acute IV hydromorphone and IV buprenorphine doses in nontolerant individuals is 4:1<sup>42</sup>; however, the 1:1 dosing in this study shows results in the opposite direction. Future studies could look at both comparable opioids (including additional sublingual buprenorphine) and nonopioid pharmacotherapies to provide analgesia in this population, such as ketamine, cannabinoid receptor agonists, or antiinflammatory medications. This study examined treatment of acute experimental pain, not clinical pain. This approach was chosen to enhance control of possible influences of analgesic outcomes and to isolate the study medication dose-response curve. Quantitative sensory testing has been shown to closely mimic acute clinical pain<sup>53</sup> and its responsiveness to opioid administration, although future studies should

examine optimal pain treatment in clinical settings. Last, the timing of buprenorphine/naloxone maintenance dose was held constant in this study. It is probable that the results would have been different if the maintenance dose had been given much closer to experimental sessions or if we waited longer than 17 h. However, trough levels were used to balance risk of respiratory depression with safety of withholding buprenorphine treatment in a stable patient.

## Conclusion

This study provides crucial, controlled experimental evidence concerning pharmacologic strategies for acute analgesia in persons maintained on buprenorphine. We report that doses of at least 16 mg of hydromorphone were necessary to provide analgesia in this population and that additional buprenorphine may also be effective. However, high doses of hydromorphone conferred increased risk of abuse liability. The present study demonstrates that high doses of opioids may be necessary to treat acute pain in buprenorphine-maintained individuals; however, it is important to note that clinical acumen is necessary to determine safety on a case-by-case basis.

## Research Support

Supported by National Institute on Drug Abuse (Rockville, Maryland) grant No. K23 DA029609 (to Dr. Tompkins) and grant No. T32DA007209 (for Dr. Huhn), and National Center for Advancing Translational Sciences (Bethesda, Maryland) grant No. UL1 TR 000424-06 for use of The Johns Hopkins Clinical Research Unit (Baltimore, Maryland).

## Competing Interests

Indivior, Inc. (North Chesterfield, Virginia) provided study medications. Dr. Tompkins has also had research funding from Alkermes (Dublin, Ireland) and serves on a Scientific Advisory Board for Alkermes. Dr. Strain has served as a consultant or served on advisory boards for Indivior, The Oak Group (Boston, Massachusetts), Egalet Pharmaceuticals (Wayne, Pennsylvania), Caron (Wernersville, Pennsylvania), Innocoll (Newtown Square, Pennsylvania), and Pinney Associates (Bethesda, Maryland) and has received research funding through his university from Alkermes. The other authors declare no competing interests.

## Reproducible Science

Full protocol available at: david.tompkins@ucsf.edu. Raw data available at: david.tompkins@ucsf.edu.

## Correspondence

Address correspondence to Dr. Tompkins: Zuckerberg San Francisco General Hospital, 1001 Potrero Avenue, Ward 95, San Francisco, California 94110. david.tompkins@ucsf.edu. This article may be accessed for personal use at no charge through the Journal Web site, [www.anesthesiology.org](http://www.anesthesiology.org).

## References

- Morgan JR, Schackman BR, Leff JA, Linas BP, Walley AY: Injectable naltrexone, oral naltrexone, and buprenorphine utilization and discontinuation among individuals treated for opioid use disorder in a United States commercially insured population. *J Subst Abuse Treat* 2018; 85:90–6
- Turner L, Kruszewski SP, Alexander GC: Trends in the use of buprenorphine by office-based physicians in the United States, 2003–2013. *Am J Addict* 2015; 24:24–9
- Kakko J, Grönbladh L, Svanborg KD, von Wachenfeldt J, Rück C, Rawlings B, Nilsson LH, Heilig M: A stepped care strategy using buprenorphine and methadone *versus* conventional methadone maintenance in heroin dependence: A randomized controlled trial. *Am J Psychiatry* 2007; 164:797–803
- Volkow ND, Frieden TR, Hyde PS, Cha SS: Medication-assisted therapies: Tackling the opioid-overdose epidemic. *N Engl J Med* 2014; 370:2063–6
- Dhingra L, Perlman DC, Masson C, Chen J, McKnight C, Jordan AE, Wasser T, Portenoy RK, Cheatile MD: Longitudinal analysis of pain and illicit drug use behaviors in outpatients on methadone maintenance. *Drug Alcohol Depend* 2015; 149:285–9
- Dunn KE, Finan PH, Tompkins DA, Fingerhood M, Strain EC: Characterizing pain and associated coping strategies in methadone and buprenorphine-maintained patients. *Drug Alcohol Depend* 2015; 157:143–9
- Han B, Gfroerer JC, Colliver JD, Penne MA: Substance use disorder among older adults in the United States in 2020. *Addiction* 2009; 104:88–96
- Jasinski DR, Pevnick JS, Griffith JD: Human pharmacology and abuse potential of the analgesic buprenorphine: A potential agent for treating narcotic addiction. *Arch Gen Psychiatry* 1978; 35:501–16
- Johnson RE, Strain EC, Amass L: Buprenorphine: How to use it right. *Drug Alcohol Depend* 2003; 70:S59–77
- Anderson TA, Quaye ANA, Ward EN, Wilens TE, Hilliard PE, Brummett CM: To stop or not, that is the question: Acute pain management for the patient on chronic buprenorphine. *ANESTHESIOLOGY* 2017; 126:1180–6
- Wasson M, Beirne OR: Buprenorphine therapy: An increasing challenge in oral and maxillofacial surgery. *Oral Surg Oral Med Oral Pathol Oral Radiol* 2013; 116:142–6
- Sen S, Arulkumar S, Cornett EM, Gayle JA, Flower RR, Fox CJ, Kaye AD: New pain management options for the surgical patient on methadone and buprenorphine. *Curr Pain Headache Rep* 2016; 20:16
- Patanwala AE, Keim SM, Erstad BL: Intravenous opioids for severe acute pain in the emergency department. *Ann Pharmacother* 2010; 44:1800–9
- Bickel WK, Amass L, Crean JP, Badger GJ: Buprenorphine dosing every 1, 2, or 3 days in opioid-dependent patients. *Psychopharmacology (Berl)* 1999; 146:111–8
- Rosen MI, Wallace EA, McMahon TJ, Pearsall HR, Woods SW, Price LH, Kosten TR: Buprenorphine: Duration of blockade of effects of intramuscular hydromorphone. *Drug Alcohol Depend* 1994; 35:141–9
- Correia CJ, Walsh SL, Bigelow GE, Strain EC: Effects associated with double-blind omission of buprenorphine/naloxone over a 98-h period. *Psychopharmacology (Berl)* 2006; 189:297–306
- Strain EC, Walsh SL, Preston KL, Liebson IA, Bigelow GE: The effects of buprenorphine in buprenorphine-maintained volunteers. *Psychopharmacology (Berl)* 1997; 129:329–38
- Stahl C, Olesen AE, Andresen T, Arendt-Nielsen L, Drewes AM: Assessing analgesic actions of opioids by experimental pain models in healthy volunteers: An updated review. *Br J Clin Pharmacol* 2009; 68:149–68
- Duffy KJ, Flickinger KL, Kristan JT, Repine MJ, Gianforcaro A, Hasley RB, Feroz S, Rupp JM, Al-Baghli J, Pacella ML, Suffoletto BP, Callaway CW: Quantitative sensory testing measures individual pain responses in emergency department patients. *J Pain Res* 2017; 10:1241–53
- Grosen K, Fischer IW, Olesen AE, Drewes AM: Can quantitative sensory testing predict responses to analgesic treatment? *Eur J Pain* 2013; 17:1267–80
- Babalonis S, Lofwall MR, Nuzzo PA, Walsh SL: Pharmacodynamic effects of oral oxycodone: Abuse liability, analgesic profile and direct physiologic effects in humans. *Addict Biol* 2016; 21:146–58
- Coe MA, Nuzzo PA, Lofwall MR, Walsh SL: Effects of short-term oxycodone maintenance on experimental pain responses in physically dependent opioid abusers. *J Pain* 2017; 18:825–34
- Kraus ML, Alford DP, Kotz MM, Levounis P, Mandell TW, Meyer M, Salsitz EA, Wetterau N, Wyatt SA; American Society Of Addiction Medicine: Statement of the American Society Of Addiction Medicine Consensus Panel on the use of buprenorphine in office-based treatment of opioid addiction. *J Addict Med* 2011; 5:254–63
- van Eekelen AP, Kerkhof GA, van Amsterdam JG: Circadian variation in cortisol reactivity to an acute stressor. *Chronobiol Int* 2003; 20:863–78

25. Lecrubier Y, Sheehan DV, Weiller E, Amorim P, Bonora I, Sheehan KH, Janavs J, Dunbar GC: The Mini International Neuropsychiatric Interview (MINI): A short diagnostic structured interview: Reliability and validity according to the CIDI. *Eur Psychiatry* 1997; 12:224–31
26. Bickel WK, Stitzer ML, Bigelow GE, Liebson IA, Jasinski DR, Johnson RE: Buprenorphine: Dose-related blockade of opioid challenge effects in opioid dependent humans. *J Pharmacol Exp Ther* 1988; 247:47–53
27. Walker DJ, Zacny JP, Galva KE, Lichtor JL: Subjective, psychomotor, and physiological effects of cumulative doses of mixed-action opioids in healthy volunteers. *Psychopharmacology (Berl)* 2001; 155:362–71
28. Wenger GR: Cumulative dose-response curves in behavioral pharmacology. *Pharmacol Biochem Behav* 1980; 13:647–51
29. Dobrila-Dintinjana R, Nacinović-Duletić A: Placebo in the treatment of pain. *Coll Antropol* 2011; 35:319–23
30. Umbricht A, Huestis MA, Cone EJ, Preston KL: Effects of high-dose intravenous buprenorphine in experienced opioid abusers. *J Clin Psychopharmacol* 2004; 24:479–87
31. Dunn KE, Brands B, Marsh DC, Bigelow GE: Characterizing the subjective, observer-rated, and physiological effects of hydromorphone relative to heroin in a human laboratory study. *Psychopharmacology (Berl)* 2018; 235:971–81
32. Murray A, Hagen NA: Hydromorphone. *J Pain Symptom Manage* 2005; 29:S57–66
33. Staahl C, Olesen AE, Andresen T, Arendt-Nielsen L, Drewes AM: Assessing analgesic actions of opioids by experimental pain models in healthy volunteers: An updated review. *Br J Clin Pharmacol* 2009; 68:149–68
34. Brennum J, Kjeldsen M, Jensen K, Jensen TS: Measurements of human pressure-pain thresholds on fingers and toes. *Pain* 1989; 38:211–7
35. Jensen R, Rasmussen BK, Pedersen B, Lous I, Olesen J: Cephalic muscle tenderness and pressure pain threshold in a general population. *Pain* 1992; 48:197–203
36. Preston KL, Bigelow GE, Liebson IA: Butorphanol-precipitated withdrawal in opioid-dependent human volunteers. *J Pharmacol Exp Ther* 1988; 246:441–8
37. Food and Drug Administration: Assessment of Abuse Potential of Drugs: Guidance for Industry, US Department of Health and Human Services, FDA, Center for Drug Evaluation and Research (CDER) Silver Spring, MD, 2017. Available at <https://www.fda.gov/downloads/drugs/guidances/ucm198650.pdf>
38. Griffiths R, JR Troisi I, Silverman K, Miumford G: Multiple-choice procedure: An efficient approach for investigating drug reinforcement in humans. *Behav Pharmacol* 1993; 4:3–14
39. Tompkins DA, Lanier RK, Harrison JA, Strain EC, Bigelow GE: Human abuse liability assessment of oxycodone combined with ultra-low-dose naltrexone. *Psychopharmacology (Berl)* 2010; 210:471–80
40. Brown EG, Wood L, Wood S: The medical dictionary for regulatory activities (MedDRA). *Drug Saf* 1999; 20:109–17
41. Koltzenburg M, Pokorny R, Gasser UE, Richarz U: Differential sensitivity of three experimental pain models in detecting the analgesic effects of transdermal fentanyl and buprenorphine. *Pain* 2006; 126:165–74
42. Practical Pain Management: Opioid Conversion Calculator. 2017. Available at: <https://opioidcalculator.practicalpainmanagement.com/methods.php>. Accessed December 14, 2017
43. Benyamin R, Trescot AM, Datta S, Buenaventura R, Adlaka R, Sehgal N, Glaser SE, Vallejo R: Opioid complications and side effects. *Pain Physician* 2008; 11:S105–20
44. Aloisi AM, Aurilio C, Bachiooco V, Biasi G, Fiorenzani P, Pace MC, Paci V, Pari G, Passavanti G, Ravaioli L, Sindaco G, Vellucci R, Ceccarelli I: Endocrine consequences of opioid therapy. *Psychoneuroendocrinology* 2009; 34:S162–8
45. Solomon RE, Gebhart GF: Intrathecal morphine and clonidine: Antinociceptive tolerance and cross-tolerance and effects on blood pressure. *J Pharmacol Exp Ther* 1988; 245:444–54
46. Koenig J, Jarczok MN, Ellis RJ, Bach C, Thayer JF, Hillecke TK: Two-week test-retest stability of the cold pressor task procedure at two different temperatures as a measure of pain threshold and tolerance. *Pain Pract* 2014; 14:E126–35
47. Tompkins DA, Smith MT, Bigelow GE, Moaddel R, Venkata SL, Strain EC: The effect of repeated intramuscular alfentanil injections on experimental pain and abuse liability indices in healthy males. *Clin J Pain* 2014; 30:36–45
48. Compton P, Charuvastra VC, Ling W: Pain intolerance in opioid-maintained former opiate addicts: Effect of long-acting maintenance agent. *Drug Alcohol Depend* 2001; 63:139–46
49. Mitchell LA, MacDonald RA, Brodie EE: Temperature and the cold pressor test. *J Pain* 2004; 5:233–7
50. Wolf S, Hardy JD: Studies on pain: Observations on pain due to local cooling and on factors involved in the “cold pressor” effect. *J Clin Invest* 1941; 20:521–33
51. Vlaeyen JW, Linton SJ: Fear-avoidance and its consequences in chronic musculoskeletal pain: A state of the art. *Pain* 2000; 85:317–32
52. Nouwen A, Cloutier C, Kappas A, Warbrick T, Sheffield D: Effects of focusing and distraction on cold pressor-induced pain in chronic back pain patients and control subjects. *J Pain* 2006; 7:62–71
53. Bisgaard T, Klarskov B, Rosenberg J, Kehlet H: Characteristics and prediction of early pain after laparoscopic cholecystectomy. *Pain* 2001; 90:261–9
